# Supplementary material
Source: Research Square preprint supplement (doi:10.21203/rs.3.rs-8815313/v1)
Supplement: Supplementary file 1 [file 304884910f8f2172df36dfbe.xlsx]

## Sheet: Sheet1
FileName	Batch	Authors	Year	Title	Journal	Volume/Issue	Pages/ArticleNo	DOI	Application Domain	Method (DFT/TDDFT)	Environmental Treatment	Role (Core/Supporting)	QC_Flag
35 s43630-022-00187-2.pdf	Batch-1	Kimberly Jacoby Morris	2022	Comparing ultrafast excited state quenching of flavin 1,N6-ethenoadenine dinucleotide and flavin adenine dinucleotide by optical spectroscopy and DFT calculations	Photochemical & Photobiological Sciences	959		10.1007/s43630-022-00187-2
36 s11696-021-01540-y.pdf	Batch-1	Ahmed A. Al-Hossainy	2021	Synthesis of novel keto-bromothymol blue in different media using oxidation–reduction reactions: combined experimental and DFT-TDDFT computational studies	Chemical Papers	75	3103–3118	10.1007/s11696-021-01540-y
37 s00894-023-05685-3.pdf	Batch-1	Henrique de Castro Silva Junior	2023	Tweaking the conjugation effects on a pair of new triazene compounds by targeted deprotonation: a spectroscopic and theoretical overview	Journal of Molecular Modeling	29	298	10.1007/s00894-023-05685-3
38 s10904-025-03893-3.pdf	Batch-1	Ehsan Ullah Mughal	2025	Journal of Inorganic and Organometallic Polymers and Materials (2025) 35:9958–9984	Terpyridine-Based Sensors for Metal Ion Detection: High Sensitivity, Selectivity, and Computational Analysis of Binding Mechanisms	35	9958–9984	10.1007/s10904-025-03893-3
40 s00894-025-06525-2.pdf	Batch-1	Bahjat S. Hameed	2025	Design and theoretical investigation of diphenylsulfone-based blue-emitting TADF materials for advanced OLED applications	Journal of Molecular Modeling	31	286	10.1007/s00894-025-06525-2
41 s00214-022-02919-0 (1).pdf	Batch-1	Meng Dai	2022	The fluorescence mechanism of a probe based on benzothiazole group to detect HClO	Theoretical Chemistry Accounts	141	57	10.1007/s00214-022-02919-0
43 s12039-024-02319-w.pdf	Batch-1	E H El-Mossalamy	2024	Structural tailoring and computational studies of benzothiophene-based charge transfer complexes	J. Chem. Sci.	136	91	10.1007/s12039-024-02319-w
44 s11426-025-2772-2.pdf	Batch-1	Wenhai Bian	2025	Cyclization regulated fluorescent emission on multiple conjugate acceptors: mechanistic studies and protein labeling applications in living cells	Science China Press	68	5892-5902	10.1007/s11426-025-2772-2
46 s11243-024-00622-6.pdf	Batch-1	Manisha Das	2025	Synthesis, crystal structure, theoretical investigation and catalytic activity study of mononuclear nickel(II) complex	Transition Metal Chemistry	50	269–281	10.1007/s11243-024-00622-6
47 s00894-025-06417-5.pdf	Batch-1	Heloisa N. S. Menezes	2025	Shedding light on main-group dithiolene chemistry: electronic and geometrical perspectives of Tris(dmit) complexes	Journal of Molecular Modeling	31	192	10.1007/s00894-025-06417-5
49 s11696-024-03710-0.pdf	Batch-2	Fatima Sarwar	2024	Designing of halogenated and traditional donor–acceptors composites for high-performance nonlinear optical applications	Chemical Papers	78	8773–8787	10.1007/s11696-024-03710-0
50 s11224-022-01904-4.pdf	Batch-2	Murugesan Velayudham	2022	Structural behavior of rhenium complexes in fluoride sensing: a spectroscopic and computational study	Structural Chemistry	33	1041–1053	10.1007/s11224-022-01904-4
52 s00894-023-05759-2.pdf	Batch-2	Shilpa Kashyap	2023	Electric field effect on HfxTiyO2(x+y) clusters for applications in MOSFETs and DSSCs: a DFT study	Journal of Molecular Modeling	29	376	10.1007/s00894-023-05759-2
53 s13233-023-00182-1.pdf	Batch-2	A. Hfaiedh	2023	Synthesis, characterization and structure–property study of new push–pull carbazole materials	Macromolecular Research	31	981–999	10.1007/s13233-023-00182-1
54 s43630-021-00144-5.pdf	Batch-2	Abraham K. Newman	2022	Substituent effects on the UV–visible spectrum and excited electronic states of dithiocarboxylates	Photochemical & Photobiological Sciences	21	303–318	10.1007/s43630-021-00144-5
56 s43630-025-00778-9.pdf	Batch-2	Lyudmila N. Telegina	2025	Tuning of photophysical, photo- and electrochemical properties of unsymmetrical D–A1–A2 systems based on cymantrenyl diimides	Photochemical & Photobiological Sciences	24	1561–1573	10.1007/s43630-025-00778-9
57 s11814-021-0924-z.pdf	Batch-2	Mohammed Ashraf Uddin	2022	UV-Visible spectroscopic and DFT studies of the binding of ciprofloxacin hydrochloride antibiotic drug with metal ions at numerous temperatures	Korean J. Chem. Eng.	39	664-673	10.1007/s11814-021-0924-z
58 s12039-023-02155-4.pdf	Batch-2	Monoj Samanta	2023	Photoisomerization of acetone via Rydberg excitation	J. Chem. Sci.	135	49	10.1007/s12039-023-02155-4
59 s12633-025-03349-w.pdf	Batch-2	Kama Hosea Gobak	2025	A Computational Study of Organosulfur Adsorption on Silicon Fullerenes: Implications for Improving Environmental Safety	Silicon	17	2299–2312	10.1007/s12633-025-03349-w
60 s43630-021-00103-0.pdf	Batch-2	Valery V. Volchkov	2021	Intramolecular photo-driven charge transfer in a series of pyridyl substituted phenyloxazoles. Structural relaxation in meta-substituted ethylpyridinium derivative of phenyloxazole	Photochemical & Photobiological Sciences	20	1419–1428	10.1007/s43630-021-00103-0
67 s11426-022-1490-8.pdf	Batch-3	Botao Wu	2023	Synthesis and structural analysis of titanium-μ-dinitrogen complex supported by di-anionic guanidinate ligands	Science China Press	66	755-759	10.1007/s11426-022-1490-8
69 s12039-020-01846-6.pdf	Batch-3	Roumi Patra	2020	Synthesis, crystal structure, DFT calculation and trans → cis isomerisation studies of bipyridyl ruthenium(II) complexes bearing 8-oxyquinolate azo ligands	J. Chem. Sci.	132	140	10.1007/s12039-020-01846-6)
70 s11224-022-01983-3.pdf	Batch-3	Abrar U. Hassan	2023	Novel pull–push organic switches with D–π–A structural designs: computational design of star shape organic materials	Structural Chemistry	34	399–412	10.1007/s11224-022-01983-3
71 s00894-020-04635-7.pdf	Batch-3	Nitika	2021	Excited state and charge transfer dynamics in gas phase molecule of CH3NH3PbI3: first-principles study	Journal of Molecular Modeling	27	27	10.1007/s00894-020-04635-7
73 s10876-023-02449-0.pdf	Batch-3	Yichun Wu	2023	Theoretical Study of the Structures and Properties of WLin (n = 2-12) Bimetallic Clusters	Journal of Cluster Science	34	3087–3093	10.1007/s10876-023-02449-0
74 s00894-020-04533-y.pdf	Batch-3	Hema	2020	Computational study of the intermolecular interactions and their effect on the UV-visible spectra of the ternary liquid mixture of benzene, ethanol and propylene glycol	Journal of Molecular Modeling	26	268	10.1007/s00894-020-04533-y)
75 s00214-020-02609-9.pdf	Batch-3	Sherin Joy	2020	Influence of explicit water molecules on the charge migration dynamics of peptidomimetics: a DFT study	Theoretical Chemistry Accounts	139	92	10.1007/s00214-020-02609-9
76 s10973-021-10803-5.pdf	Batch-3	Jeniffer Meyer Moreira	2022	Copper (II) complexes with novel Schiff-based ligands: synthesis, crystal structure, thermal (TGA–DSC/FT-IR), spectroscopic (FT-IR, UV-Vis) and theoretical studies	Journal of Thermal Analysis and Calorimetry	147	4087–4098	10.1007/s10973-021-10803-5
Accurate_Relativistic_Real_Time_Time_Dep.pdf	Batch-3	Torsha Moitra	2023	Accurate Relativistic Real-Time Time-Dependent Density Functional Theory for Valence and Core Attosecond Transient Absorption Spectroscopy	The Journal of Physical Chemistry Letters	14	1714-1724	10.1021/acs.jpclett.2c03599
Density_functional_theory_studies_of_the.pdf	Batch-3	Samira Mahmoudi	2021	Density functional theory studies of the antioxidants—a review	Journal of Molecular Modeling	27	271	10.1007/s00894-021-04891-1
Study_of_UV_Vis_absorption_spectra_of_ma.pdf	Batch-4	F. Baniasadi	2021	Study of UV-Vis absorption spectra of magnetic molecule tripyridinium	American Institute of Physics
Substituent_effects_on_the_UV_visible_sp.pdf	Batch-4	Abraham K. Newman	2021	Substituent effects on the UV–visible spectrum and excited electronic states of dithiocarboxylates	Photochemical & Photobiological Sciences			10.1007/s43630-021-00144-5
s00214-023-02999-6.pdf	Batch-4	Baozhu Yang	2023	A structure and spectroscopy study about [16]cycloparaphenylene chiral molecule	Theoretical Chemistry Accounts	142	59	10.1007/s00214-023-02999-6
s00214-024-03151-8.pdf	Batch-4	Federico Coppola	2024	Tetracyanoethylene / radical anion coordination sites unveiled via electronic and vibrational fingerprints	Theoretical Chemistry Accounts	143	77	10.1007/s00214-024-03151-8
s00214-025-03190-9.pdf	Batch-4	Fatemeh Mohammadtabar	2025	Distinguishing damaged DNA bases: a detailed TDDFT study of the HHG and optical absorption cross-section spectra of DNA adducts	Theoretical Chemistry Accounts	144	35	10.1007/s00214-025-03190-9
s00894-023-05465-z.pdf	Batch-4	Andrey E. Sidorin	2023	Electronic structure, cationic, and excited states of nitrogen-containing spiroborates	Journal of Molecular Modeling	29	69	10.1007/s00894-023-05465-z
s00894-023-05482-y.pdf	Batch-4	Állefe Barbosa Cruz	2023	Theoretical and experimental study of the diastereoisomers (	Journal of Molecular Modeling	29	77	10.1007/s00894-023-05482-y
s00894-024-05859-7.pdf	Batch-4	Ricardo Montserrat	2024	Total absorption spectrum of benzene aggregates obtained from two different approaches	Journal of Molecular Modeling	30	66	10.1007/s00894-024-05859-7
s00894-024-06138-1.pdf	Batch-4	Marrigje M. Conradie	2024	Cu(β‑diketonato)2 bathochromic shifts from the ultraviolet towards the visible region	Journal of Molecular Modeling	30	336	10.1007/s00894-024-06138-1
s00894-025-06431-7.pdf	Batch-4	Ansa Latif	2025	Density functional theory for nanomaterials: structural and spectroscopic applications—a review	Journal of Molecular Modeling	31	211	10.1007/s00894-025-06431-7
s00894-025-06442-4.pdf	Batch-5	Xiaoyu Zhang	2025	Theoretical investigation of solvent-polarity-dependent excited-state intramolecular proton transfer behavior for incorporated bulky –CF	Journal of Molecular Modeling	31	219	10.1007/s00894-025-06442-4
s00894-025-06465-x.pdf	Batch-5	Le Zhang	2025	Theoretical analysis of atomic electronegativity effects on excited state behaviors for HBT-PhCz derivatives	Journal of Molecular Modeling	31	239	10.1007/s00894-025-06465-x
s00894-025-06530-5.pdf	Batch-5	Rimpee Kumari Sah	2025	Structural, electronic, NLO, UV–Vis, and vibrational studies of Schiff base liquid crystals TBnA (	Journal of Molecular Modeling	31	345	10.1007/s00894-025-06530-5
s00894-025-06543-0.pdf	Batch-5	Susheel	2025	DFT and TDDFT studies on π-conjugated ligands for copper sensing: analyzing electronic structures and optical performance	Journal of Molecular Modeling	31	306	10.1007/s00894-025-06543-0
s10847-022-01156-z.pdf	Batch-5	Ju Xie	2022	Cyclized oligomer of tetracyanoquinodimethane-tetrathiafulvalene (TCNQ-TTF): a versatile macrocyclic molecule by DFT calculations	Journal of Inclusion Phenomena and Macrocyclic Chemistry	102	751–761	10.1007/s10847-022-01156-z
s10854-025-16303-8.pdf	Batch-5	B. R. Akshata	2025	Structure–property correlation and photophysical behavior of sulphamic acid crystals: a combined experimental and DFT approach	J Mater Sci: Mater Electron	36	2293	10.1007/s10854-025-16303-8
s10904-025-03928-9.pdf	Batch-5	Tanin Nanok	2025	Structural and Mechanistic Insights into a Cu-Adenine MOF for Selective Fluorescence Sensing of Antibiotics: Experimental and TDDFT Approaches	Journal of Inorganic and Organometallic Polymers and Materials	35	10360–10376	10.1007/s10904-025-03928-9
s10953-023-01271-6.pdf	Batch-5	Valery V. Volchkov	2023	Hydrogen-Bonded Self-assembly of Supramolecular Donor–Acceptor Complexes of (E)-Bis(18-crown-6)azobenzene with Bis(ammoniopropyl) Derivatives of Bipyridine and Dipyridylethylene in Acetonitrile	Journal of Solution Chemistry	52	805–822	10.1007/s10953-023-01271-6
s11082-025-08563-9.pdf	Batch-5	Nosrat Madadi Mahani	2025	Synthesis, DFT and TD-DFT study of the nonlinear optical and electronic properties of new quinoxaline acceptors for dye- sensitized solar cells	Optical and Quantum Electronics	57	653	10.1007/s11082-025-08563-9
s11224-025-02620-5.pdf	Batch-5	Imran Muhammad	2025	Fluorescence quenching and electronic interaction of (S)-5-(dimethylamino)-N-(1-phenylethyl)naphthalene-1-sulfonamide for selective nitroaromatic detection and DFT study	Structural Chemistry			10.1007/s11224-025-02620-5
s11426-024-2386-0.pdf	Batch-6	Xiaoyong Zhai	2024	Ag+-induced energy level splitting in Ln-MOFs achieves enhanced Eu3+ emission intensity	Science China Chemistry	68	924-934	10.1007/s11426-024-2386-0
s11696-022-02279-w.pdf	Batch-6	Eman M. F. Abd El. Halium	2022	TD-DFT calculations and two-dimensional poly (ortho phenylenediamine-co-meta-phenylene diamine) for polymeric solar cell applications	Chemical Papers	76	6175–6191	10.1007/s11696-022-02279-w
s11696-022-02340-8.pdf	Batch-6	Gayani N. Pallewela	2023	A DFT, TDDFT and QTAIM study of the acridine pincer ligand-based Ru(II) and Rh(III) complexes: detailed analysis of the metal-F bonding	Chemical Papers	77	47–61	10.1007/s11696-022-02340-8
s11696-024-03526-y.pdf	Batch-6	Debosreeta Bose	2024	DFT Analyses of arsylsemicarbazone group as functional compound for application as excellent fluorescent probes and medicament: study on virtual screening through molecular docking	Chemical Papers	78	6069–6082	10.1007/s11696-024-03526-y
s11696-024-03532-0.pdf	Batch-6	Nasser Almutlaq	2024	Exploring the application and simulated TD-DFT of nano hybrid nanocomposite bromocresol green derivatives dye and glycine with titanium oxide nanoparticles	Chemical Papers	78	6159–6178	10.1007/s11696-024-03532-0
s11771-023-5291-y.pdf	Batch-6	SAFAEI ARDAKANI Yadollah, MORADI Mahmood	2023	DFT/TDDFT study on electronic, optical and structural properties of MAPbI3/RbSnI2Cl and MAPbI2Cl/RbXI3 (X=Pb, Sn) heterostructures	J. Cent. South Univ.	30	1447	10.1007/s11771-023-5291-y.
s11837-024-06644-w.pdf	Batch-6	Heryanto Heryanto	2024	Science Mapping Analysis of Density Functional Theory (DFT) for Material Design: A Review				10.1007/s11837-024-06644-w
s12039-025-02424-4.pdf	Batch-6	Li-lin Jiang	2025	Excited-state hydrogen bond strengthening drives ultrafast electron transfer in coumarin 153/dimethylaniline complex: A TDDFT study	J. Chem. Sci.	137	88	10.1007/s12039-025-02424-4Sadhana(0123456789().
s12274-023-5674-2.pdf	Batch-6	Yang Nan	2023	Physical mechanism of contact-electrification induced photon emission spectroscopy from interfaces	Nano Research	16	11545-11555	10.1007/s12274-023-5674-2
s13065-023-00987-2.pdf	Batch-6	Ismail Badran	2023	The mechanism of fluorescence quenching of naphthalimide A/C leak detector by copper (II)	Badran and Riyaz ﻿BMC Chemistry	17	69	10.1186/s13065-023-00987-2
s13360-025-07071-9.pdf	Batch-7	Sardar A. Shah	2025	A combined experimental and first-principles study of tungsten ditelluride (WTe2) Weyl semimetal structure and optical characteristics	Eur. Phys. J. Plus	140	1124	10.1140/epjp/s13360-025-07071-9
s13738-022-02720-7.pdf	Batch-7	S. Suguna	2023	A simple symmetric N1, N2-bis 3-nitrobenzylidene fluorescent probe for Fe3+ ion: experimental and theoretical investigations	Journal of the Iranian Chemical Society	20	849–859	10.1007/s13738-022-02720-7
s13738-024-03022-w.pdf	Batch-7	Mohamed Achraf Bouicha	2024	A new Ni(II) metalloporphyrin: characterization, theoretical sensing calculations and catalytic degradation of methylene blue and methyl orange dyes	Journal of the Iranian Chemical Society	21	1611–1633	10.1007/s13738-024-03022-w
s13765-025-01030-9.pdf	Batch-7	Miyeon Bang	2025	Enhanced diastereomeric mixture analysis through integration of quantum chemical calculations with spatio-conformational information obtained from ultraselective NMR techniques	Bang and Cha ﻿Applied Biological Chemistry	68	57	10.1186/s13765-025-01030-9
s41557-024-01578-x.pdf	Batch-7	Jeroen Royakkers	2024	Synthesis of model heterojunction interfaces reveals molecular-configuration-dependent photoinduced charge transfer	nature chemistry	16	1453-1461	10.1038/s41557-024-01578-x
s41557-025-01857-1.pdf	Batch-7	Julia Soika	2025	Energy transfer-enabled enantioselective photocyclization using a privileged Al–salen catalyst	nature chemistry	17	1383-1390	10.1038/s41557-025-01857-1
s41570-024-00641-y.pdf	Batch-7	Nikolas Kaltsoyannis	2024	Understanding covalency in molecular f-block compounds from the synergy of spectroscopy and quantum chemistry	nature reviews chemistry	8	701-712	10.1038/s41570-024-00641-y
s41598-024-67360-8.pdf	Batch-7	Ben-Chao Zhu	2024	Structural and spectral properties of Gas-phase FMgn (n = 2–20) clusters based on DFT	Scientific Reports |	14	19274	10.1038/s41598-024-67360-8
s41598-024-68712-0.pdf	Batch-7	Dereje Fedasa Tegegn	2024	Investigation of substituent effects on the electronic structure and antiviral activity of favipiravir derivatives for Covid-19 treatment using DFT and molecular docking	Scientific Reports |	14	17697	10.1038/s41598-024-68712-0
s41598-024-81957-z.pdf	Batch-7	Daniel Pelczarski	2025	Excited states of mono- and biruthenium(II) complexes adsorbed on nanocrystalline titanium dioxide studied by electroabsorption spectroscopy	Scientific Reports |	15	4562	10.1038/s41598-024-81957-z
s41598-025-11683-7.pdf	Batch-8	Abdulrahman Sumayli	2025	Investigating the electronic structure and adsorption of OCN− and CN− on Si12C12 Fullerene- like cages using DFT and MD simulations	Scientific Reports |	15	28637	10.1038/s41598-025-11683-7
s41598-025-29261-2.pdf	Batch-8	Daniel Pelczarski	2025	Optical excited states of archetypical blue light emitter, dimethyl-acridine diphenyl-sulfone derivative (DMAC-DPS) in solid films, studied by electroabsorption spectroscopy	Scientific Reports |	15	44963	10.1038/s41598-025-29261-2
s41598-025-87189-z.pdf	Batch-8	Jing Huang	2025	A comprehensive DFT/TDDFT investigation into the influence of electron acceptors on the photophysical properties of ullazine-based D-π-A-π-A photosensitizers	Scientific Reports |	15	3101	10.1038/s41598-025-87189-z
s42004-025-01613-z.pdf	Batch-8	Pascal Komorr	2025	Isolation of kinetically-stabilised diarylchalcogenide radical cations	Communications Chemistry |	8	239	10.1038/s42004-025-01613-z
s42004-025-01646-4.pdf	Batch-8	Cambell S. Conour	2025	Trends in actinide electronic structure revealed from asymmetric, isostructural transuranic metallocenes	Communications Chemistry |	8	280	10.1038/s42004-025-01646-4
s42004-025-01704-x.pdf	Batch-8	Lewis G. Parker	2025	Determining structure and Zn-specific Lewis acid-base descriptors for diorganozincs in non-coordinating solvents using X-ray spectroscopy	Communications Chemistry |	8	294	10.1038/s42004-025-01704-x
s42250-023-00779-0.pdf	Batch-8	Pratibha Arya	2024	Study of Molecular Interaction in Ternary Liquid Mixture of Toluene + 1,4-Dioxane + 1-Propanol	Chemistry Africa	7	1033–1051	10.1007/s42250-023-00779-0
s42250-023-00869-z.pdf	Batch-8	Imen Romdhane	2024	Vibrational Spectroscopic, Optical Properties and Electrical Conduction Mechanism of Lead-Free Perovskite Cs2ZnCl4	Chemistry Africa	7	2209–2220	10.1007/s42250-023-00869-z
s42250-025-01378-x.pdf	Batch-8	A. Steffy	2025	A Novel Bisimine (4,6‑Triazolyl, 2‑Phenylamino,1,3,5‑Triazine) Serving as Potential Anticancer Agent and Chemosensor for the Sensitive Colorimetric Detection of Cu(II) Ion: Design, Synthesis, and Biological Evaluation of Therapeutic Efficiency	Chemistry Africa	8	4957–4972	10.1007/s42250-025-01378-x
s42250-025-01456-0.pdf	Batch-8	Khushboo Devi	2025	Synthesis, Spectroscopic and DFT Study of Pt(II)-3-hydroxy-2-(2’- thienyl)-4-oxo-4H-benzopyran Complex for Analytical and Biological Uses	Chemistry Africa	8	4985–5002	10.1007/s42250-025-01456-0
s42995-025-00294-w.pdf	Batch-9	Lu-Ping Chi	2025	Impact of dispersion correction in DFT-enhanced anisotropic NMR for stereochemical elucidation of flexible marine natural products	Marine Life Science & Technology	7	890–900	10.1007/s42995-025-00294-w
s43630-025-00737-4.pdf	Batch-9	Maryam Farmani	2025	Tipping the ultrafast photochemical balance of cis-stilbene	Photochemical & Photobiological Sciences	24	955–962	10.1007/s43630-025-00737-4
s44371-025-00382-x.pdf	Batch-9	Nidhi Nirmalkar	2025	Understanding carbon quantum dots through computational methods in quantum chemistry	Nirmalkar et al. Discover Chemistry	2	306	10.1007/s44371-025-00382-x
	Batch-9	Jennie Popay	2006	Guidance on the Conduct of Narrative Synthesis in Systematic Reviews
