# Supplementary material
Source: Research Square preprint supplement (doi:10.21203/rs.3.rs-8815313/v1)
Supplement: Supplementary file 2 [file d1e1a5b6fc831484e87add45.docx]

Table S2. Classification of reviewed studies according to their role in the thematic synthesis.

| Category | Description | References |
| --- | --- | --- |
| Core thematic studies | Studies that explicitly compare isolated-molecule TDDFT with environment-resolved approaches (solvation, aggregation, interfaces) and demonstrate qualitative changes in spectroscopic signatures or charge-transfer mechanisms. These works form the primary evidence base for the thematic synthesis in Section 4. | 1-26 |
| Supporting studies | Studies that apply DFT/TDDFT to spectroscopic interpretation without systematic comparison of environmental effects, or that report incremental improvements in agreement with experiment. These works corroborate the identified trends but are not discussed individually. | 27-44 |
